# Changes in Uric Acid Levels following Bariatric Surgery Are Not Associated with *SLC2A9* Variants in the Swedish Obese Subjects Study

Mark A. Sarzynski<sup>1</sup>, Peter Jacobson<sup>2</sup>, Tuomo Rankinen<sup>1</sup>, Björn Carlsson<sup>2</sup>, Lars Sjöström<sup>2</sup>, Claude Bouchard<sup>1</sup>, Lena M. S. Carlsson<sup>2\*</sup>

**1** Human Genomics Laboratory, Pennington Biomedical Research Center, Baton Rouge, Louisiana, United States of America, **2** Institutes of Medicine, The Sahlgrenska Academy, University of Gothenburg, Gothenburg, Sweden

## Abstract

**Context and Objective:** Obesity and *SLC2A9* genotype are strong determinants of uric acid levels. However, data on *SLC2A9* variants and weight loss induced changes in uric acid levels are missing. We examined whether the changes in uric acid levels two- and ten-years after weight loss induced by bariatric surgery were associated with *SLC2A9* single nucleotide polymorphisms (SNPs) in the Swedish Obese Subjects study.

**Methods:** SNPs (N = 14) identified by genome-wide association studies and exonic SNPs in the *SLC2A9* gene locus were genotyped. Cross-sectional associations were tested before (N = 1806), two (N = 1664) and ten years (N = 1201) after bariatric surgery. Changes in uric acid were compared between baseline and Year 2 (N = 1660) and years 2 and 10 (N = 1172). A multiple testing corrected threshold of P = 0.007 was used for statistical significance.

**Results:** Overall, 11 of the 14 tested *SLC2A9* SNPs were significantly associated with cross-sectional uric acid levels at all three time points, with rs13113918 showing the strongest association at each time point ( $R^2 = 3.7\text{--}5.2\%$ ,  $3.9 \times 10^{-22} \leq p \leq 7.7 \times 10^{-11}$ ). One SNP (rs737267) showed a significant association ( $R^2 = 0.60\%$ , P = 0.002) with change in uric acid levels from baseline to Year 2, as common allele homozygotes (C/C, N = 957) showed a larger decrease in uric acid ( $-61.4 \mu\text{mol/L}$ ) compared to minor allele carriers (A/X:  $-51.7 \mu\text{mol/L}$ , N = 702). No SNPs were associated with changes in uric acid from years 2 to 10.

**Conclusions:** SNPs in the *SLC2A9* locus contribute significantly to uric acid levels in obese individuals, and the associations persist even after considerable weight loss due to bariatric surgery. However, we found little evidence for an interaction between genotype and weight change on the response of uric acid to bariatric surgery over ten years. Thus, the fluctuations in uric acid levels among the surgery group appear to be driven by the weight losses and gains, independent of *SLC2A9* genotypes.

**Citation:** Sarzynski MA, Jacobson P, Rankinen T, Carlsson B, Sjöström L, et al. (2012) Changes in Uric Acid Levels following Bariatric Surgery Are Not Associated with *SLC2A9* Variants in the Swedish Obese Subjects Study. PLoS ONE 7(12): e51658. doi:10.1371/journal.pone.0051658

**Editor:** Anita Kloss-Brandstaetter, Innsbruck Medical University, Austria

**Received:** August 9, 2012; **Accepted:** November 6, 2012; **Published:** December 14, 2012

**Copyright:** © 2012 Sarzynski et al. This is an open-access article distributed under the terms of the Creative Commons Attribution License, which permits unrestricted use, distribution, and reproduction in any medium, provided the original author and source are credited.

**Funding:** This work was supported by grants from the Coypu Foundation to the Human Genomics Laboratory at Pennington Biomedical Research Center, the Swedish Research Council (K2010-55X-11285-13), the Swedish foundation for Strategic Research to Sahlgrenska Center for Cardiovascular and Metabolic Research, the Swedish Diabetes Foundation, and the Swedish federal government under the LUA/ALF agreement. C. Bouchard is partially supported by the John W. Barton Sr. Chair in Genetics and Nutrition. The funders had no role in study design, data collection and analysis, decision to publish, or preparation of the manuscript.

**Competing Interests:** The authors have read the journal's policy and have the following conflicts: P. Jacobson reported receiving research grants from Hoffmann LaRoche. B. Carlsson reported being employed by and holding stocks in AstraZeneca. L. Sjöström reported obtaining unrestricted Swedish Obese Subjects grants from sanofi-aventis and Johnson & Johnson since 2007; receiving lecture and consulting fees from AstraZeneca, Biovitrum, Bristol-Myers Squibb, GlaxoSmithKline, Johnson & Johnson, Lenimen, Merck, Novo Nordisk, Hoffmann LaRoche, sanofi-aventis, and Servier; and holding stocks in Lenimen and being chairman of its board. C. Bouchard reported receiving consulting fees from the Weight Watchers Scientific Advisory Board and is a member of the Scientific Advisory Board of Pathway Genomics. L. Carlsson reported serving as a consultant for AstraZeneca and holding stocks in Sahltech. The other authors have nothing to disclose. There are no patents, products in development or marketed products to declare. This does not alter the authors' adherence to all the PLOS ONE policies on sharing data and materials.

\* E-mail: lena.carlsson@medic.gu.se

## Introduction

Chronic hyperuricemia is the underlying cause of gout, the most prevalent inflammatory arthritis in developed countries [1]. Furthermore, elevated serum uric acid levels are associated with an increased risk of mortality and cardiovascular disease, as well as cardiovascular disease risk factors such as obesity, hypertension, dyslipidemia, diabetes, and the metabolic syndrome [2,3].

Elevated serum uric acid levels are associated with obesity, particularly visceral adiposity, via both increased production and decreased renal excretion of urate. [4–6] In the Turkish Adult Risk Factor Study, abdominal obesity was the strongest determinant of uric acid concentration variability after adjustment for 13 variables including total cholesterol, triglycerides, C-reactive protein, and blood pressure [7]. Several intervention and prospective studies

suggest that changes in weight and obesity measures may play a role in the regulation of serum uric acid levels [6,8–12], although the reverse scenario may also be possible [13]. For example, in the Coronary Artery Risk Development in young Adults (CARDIA) Study, 10-year changes in body mass index (BMI) and waist circumference were positively and significantly associated with 10-year change in uric acid [12].

Bariatric surgery has been considered the most reliable method of achieving long term weight loss. However, few studies have reported on the longitudinal changes in uric acid levels after bariatric surgery [14–16]. In the Swedish Obese Subjects (SOS) study, serum uric acid levels decreased 15% and 6% two and ten years after bariatric surgery, respectively [16]. In SOS, the surgery group had lower incidence rates of hyperuricemia and higher recovery from hyperuricemia over two and ten years compared to their matched, conventionally treated obese controls [16]. However, there was large inter-individual variation in the changes of uric acid levels to weight loss achieved through bariatric surgery in SOS subjects.

It is well known that uric acid levels are influenced by a strong genetic component, with heritability estimates ranging from 0.25–0.73 [17–19]. In recent genome-wide association studies (GWASs) of serum uric acid concentrations [20–25], the strongest associations in subjects of both European and African American descent have been found for single nucleotide polymorphisms (SNPs) in the solute carrier family 2, member 9 (*SLC2A9*) gene on chromosome 4, encoding a putative glucose transporter. This protein functions as a high-capacity urate transporter in humans [24,26]. A meta-analysis of 14 GWAS reports totaling 28,141 subjects of European descent found the strongest association with serum uric acid levels at the *SLC2A9* locus (rs734553,  $p = 5.2 \times 10^{-201}$ ), with 788 SNPs in *SLC2A9* reaching the genome-wide significance threshold of  $5 \times 10^{-8}$  [27]. These associations have been found to be sex-specific, with genotype having a greater effect on lowering uric acid levels in women compared to men [22,27]. Furthermore, the sex-specific associations of *SLC2A9* variants with uric acid levels have been found to be modified by BMI, with stronger effect sizes in subjects with high BMI [28].

Thus, several *SLC2A9* SNPs have been reported to be associated with uric acid levels and there are known increases in uric acid with weight gain and decreases with weight loss. However, no study has examined the association of *SLC2A9* variants with uric acid levels after sustained weight loss obtained through a lifestyle or surgical intervention. Thus, the purpose of this study is to determine whether the changes in uric acid observed with weight fluctuations are conditioned by DNA sequence differences at the *SLC2A9* locus. For this purpose, we tested the association of GWAS-derived and exonic SNPs in *SLC2A9* with serum uric acid levels up to 10 years after bariatric surgery in patients of the SOS Study.

## Methods

### Ethics Statement

Written Informed consent was obtained for all study participants. All clinical investigations have been conducted according to the principles expressed in the Declaration of Helsinki. The SOS study protocol was approved by the following Swedish ethics committees: Regional Institutional Review Board of Gothenburg University, Regional Institutional Review Board of Linköping University, Regional Institutional Review Board of Lund University, Regional Institutional Review Board of Karolinska Institute, in Stockholm, Regional Institutional Review Board of Umeå

University, Regional Institutional Review Board of Örebro University and Regional Institutional Review Board of Uppsala University. The SOS trial has been registered in the ClinicalTrials.gov registry (NCT01479452, <http://clinicaltrials.gov/ct2/show/NCT01479452?term>).

### Design of the SOS Study

The SOS study has previously been described in detail. [16] In brief, SOS is a prospective, non-randomized clinical trial of the health effects of intentional weight reduction in the severely obese. Inclusion criteria included age (37–60 years at accrual) and BMI ( $\geq 34 \text{ kg/m}^2$  for males and  $\geq 38 \text{ kg/m}^2$  for females). Exclusion criteria, described elsewhere [29], were minimal and aimed at ensuring subjects in the surgery group could tolerate the operation. Between 1987 and 2001, a total of 4047 severely obese subjects were included from the registry study and from waiting lists at surgical departments. Among those, 2010 eligible subjects desiring surgery constituted the surgery group, whereas the matched control group of 2037 subjects was offered conventional treatment at their primary health-care center. Surgical treatment included vertical banded gastroplasty ( $n = 1368$ ), banding ( $n = 377$ ), or gastric bypass ( $n = 265$ ). Baseline examinations took place 4 weeks before surgery and the intervention study began on the day of the surgically treated subject's operation. Follow-up examinations (at 0.5, 1, 2, 3, 4, 6, 8, and 10 years) were calculated in relation to the date of surgery.

**Study sample.** For the present study, SOS version I DNA samples were used, which excludes data from 48 surgery patients affected by errors that occurred during plating of DNA samples. The present study sample was comprised of subjects from the surgical treatment group only with valid genotype and uric acid concentration data ( $N = 1806$ ).

### Uric Acid Assessment

Serum uric acid measurements were performed at the baseline and years 2 and 10 follow-up examinations. Blood samples were collected after an overnight (10–12 hour) fast. Uric acid concentration was measured using a calorimetric uricase method on a Clinicon Prisma instrument (from 1987), a Technicon DAX 72 autoanalyzer (from 1991), a Beohringer Mannheim Hitachi 917 analyzer (from 1995), a Roche Diagnostics Modular system (from 2002) or a Roche Diagnostics Cobas 8000 system (from 2010).

### SNP Selection

SNPs from the *SLC2A9* gene were selected for the present study because they were identified in previous uric acid GWAS reports or located in exons. The following eight SNPs were derived from the first two GWAS reports [24,25]: rs13129697, rs737267, rs4447863, rs7442295, rs13131257, rs6449213, rs1014290, and rs9291642 (the latter tags rs733175 for which the assay failed). Six *SLC2A9* SNPs were selected because they were exonic: rs2280205, rs734553 (tags rs16890979 [Val282Ile]), rs3733591, rs13125646, rs13113918, and rs6820230. Eight additional SNPs were genotyped as tagSNPs in case of assay failure: rs734553, rs6855911, rs4697701, rs16868246, rs13125209, rs13115193, rs7680126, and rs3796834.

### Genotyping

The SNPs were genotyped using Illumina (San Diego, CA) GoldenGate chemistry and Sentrix Array Matrix technology on the BeadStation 500GX. Genotype calling was done with the Illumina BeadStudio software and each call was confirmed

**Table 1.** Basic characteristics of SOS subjects with DNA and data for uric acid levels in the total sample and by surgery group.

| Time     |                                  | All subjects               | Vertical banded gastroplasty | Banding                   | Gastric bypass           | Main Effect | Post-hoc |
|----------|----------------------------------|----------------------------|------------------------------|---------------------------|--------------------------|-------------|----------|
| Point    | Variable                         | Mean (SD)                  | Mean (SD)                    | Mean (SD)                 | Mean (SD)                | P value     | P value  |
| Baseline | N                                | 1806                       | 1213                         | 345                       | 248                      |             |          |
|          | Age, yrs                         | 47.1 (5.9)                 | 47.1 (5.9)                   | 47.5 (6.0)                | 47.0 (6.0)               | 0.50        | –        |
|          | Sex, % female                    | 70.3                       | 70.7                         | 68.1                      | 71.8                     | 0.57        | –        |
|          | BMI, kg/m <sup>2</sup>           | 42.3 (4.5)                 | 42.3 (4.4)                   | 41.6 (4.2)                | 43.8 (5.1)               | <0.0001     | <0.0001  |
|          | Weight, kg                       | 120.9 (16.7)               | 120.2 (16.1)                 | 119.9 (16.1)              | 125.3 (19.3)             | <0.0001     | <0.0001  |
|          | Serum uric acid, μmol/L          | 358.3 (78.6)               | 357.8 (76.6)                 | 361.9 (80.9)              | 355.9 (84.5)             | 0.61        | –        |
| Year 2   | N                                | 1664                       | 1105                         | 328                       | 231                      |             |          |
|          | BMI, kg/m <sup>2</sup>           | 32.3 (4.8)                 | 32.7 (4.7)                   | 32.5 (5.1)                | 29.9 (4.3)               | <0.0001     | <0.0001  |
|          | ΔWeight from baseline, kg        | –28.6 (14.4)               | –27.2 (12.8)                 | –25.4 (15.6)              | –39.7 (14.6)             | <0.0001     | <0.0001  |
|          | Serum uric acid, μmol/L          | 300.1 (73.8)               | 303.3 (73.4)                 | 302.4 (75.3)              | 281.5 (71.3)             | 0.0002      | <0.0001  |
|          | Δuric acid from baseline, μmol/L | –58.2 (67.2)<br>[N = 1660] | –55.0 (64.3)<br>[N = 1101]   | –58.1 (70.6)              | –73.6 (74.0)             | 0.0006      | 0.0002   |
| Year 10  | N                                | 1201                       | 856                          | 248                       | 97                       |             |          |
|          | BMI, kg/m <sup>2</sup>           | 35.1 (5.7)                 | 35.3 (5.6)                   | 35.5 (6.1)                | 33.1 (4.9)               | 0.0007      | 0.0001   |
|          | ΔWeight from Year 2, kg          | 7.3 (13.4)                 | 6.8 (13.1)                   | 8.2 (15.4)                | 9.7 (9.9)                | 0.07        | –        |
|          | Serum uric acid, μmol/L          | 329.8 (83.5)               | 330.8 (83.0)                 | 331.4 (80.8)              | 317.7 (70.6)             | 0.33        | –        |
|          | Δuric acid from Year 2, μmol/L   | +28.7 (75.1)<br>[N = 1172] | +27.7 (77.8)<br>[N = 833]    | +30.9 (67.1)<br>[N = 244] | +32.2 (70.6)<br>[N = 95] | 0.76        | –        |

Main effect P value is for the main effect of surgery technique on variable of interest. For variables showing a significant main effect of surgery technique, post-hoc pairwise comparisons were run to test the mean difference between the combined banding group (vertical banded gastroplasty and banding) and gastric bypass group. N represents the number of subjects with DNA and data for uric acid level at each time point. To convert μmol/L to mg/dL divide values by 59.48.

doi:10.1371/journal.pone.0051658.t001

manually. For quality control purposes, five CEPH control DNA samples (NA10851, NA10854, NA10857, NA10860, NA10861); all samples included in the HapMap Caucasian panel) were genotyped in triplicate. Concordance between the replicates as well as with genotypes from the HapMap database was 100%.

### Statistical Analysis

Hardy-Weinberg equilibrium was tested by comparing observed genotype frequencies to those expected based on the allele frequencies of each marker using the ALLELE procedure in SAS version 9.1 (SAS Institute Inc, Cary, NC). The pair-wise linkage disequilibrium (LD) among the SNPs was assessed using the ldmax program available in the GOLD software package. [30] Means and standard deviation (SD) were computed for all continuous variables at baseline, Year 2, and Year 10 in the total sample and by surgical technique. Differences in continuous and categorical variables between surgery groups were assessed using t-tests and chi-square tests, respectively.

Association models were performed using the total association model implemented in MERLIN version 1.1.2 [31]. This option uses a variance component model to estimate an additive effect for each SNP and carry out an association test. The evidence of association is evaluated by maximizing the likelihoods under two conditions: the null hypothesis (L0) restricts the additive genetic effect of the marker locus to zero ( $ba = 0$ ), whereas the alternative hypothesis does not impose any restrictions on  $ba$ . The quantity of twice the difference of the log likelihoods between the alternative and the null hypotheses ( $2[\ln(L1) - \ln(L0)]$ ) is distributed as  $\chi^2$  with 1 df (difference in number of parameters estimated).

Cross-sectional association models were performed at baseline, Year 2, and Year 10. The cross-sectional association models

included age, sex, and body weight as covariates. Changes in uric acid levels over time were calculated from baseline to Year 2 (N = 1660) and years 2 and 10 (N = 1172). The uric acid change over time models included baseline age, sex, and percent change in weight between selected years ( $\Delta\text{weight}/\text{initial weight}$ ) as covariates. Genotype effect size ( $R^2$ ) was defined as the proportion of total phenotypic variance explained by the genotype. Inclusion of surgery technique, lipid modifying medications, smoking, and hypertension and diabetes status as covariates in the association models did not change our overall results or interpretation. Concomitant anti-gout medication was not used as a covariate, as it was reported by less than 2 percent of the surgery cases. Thus, results are presented without these variables as covariates.

Multivariable regression models with forward selection were used to evaluate the contribution of nine predictor variables on the two changes in uric acid level after bariatric surgery phenotypes ( $\Delta\text{uric acid from baseline to Year 2}$  and  $\Delta\text{uric acid from years 2 and 10}$ ). Age, sex, smoking status, lipid medication status, diabetes status, surgical procedure, and change in HDL-C, triglycerides, and weight between the two time points were included in the models. To evaluate the ability of *SLC2A9* genotype to classify risk of hyperuricemia, we plotted receiver-operating-characteristic (ROC) curves for logistic regression models with and without *SLC2A9* rs13113918 genotype. The C statistic, a measure of the area under the ROC curve, was calculated with and without genotype. We used the prevalence of hyperuricemia at baseline, Year 2, and Year 10 as the outcome and included age, sex, weight, and hypertension status as covariates. Hyperuricemia was defined in SOS as uric acid levels  $\geq 7.6$  mg/dL or 450 μmol/L in men and  $\geq 5.7$  mg/dL or 340 μmol/L in women [16].

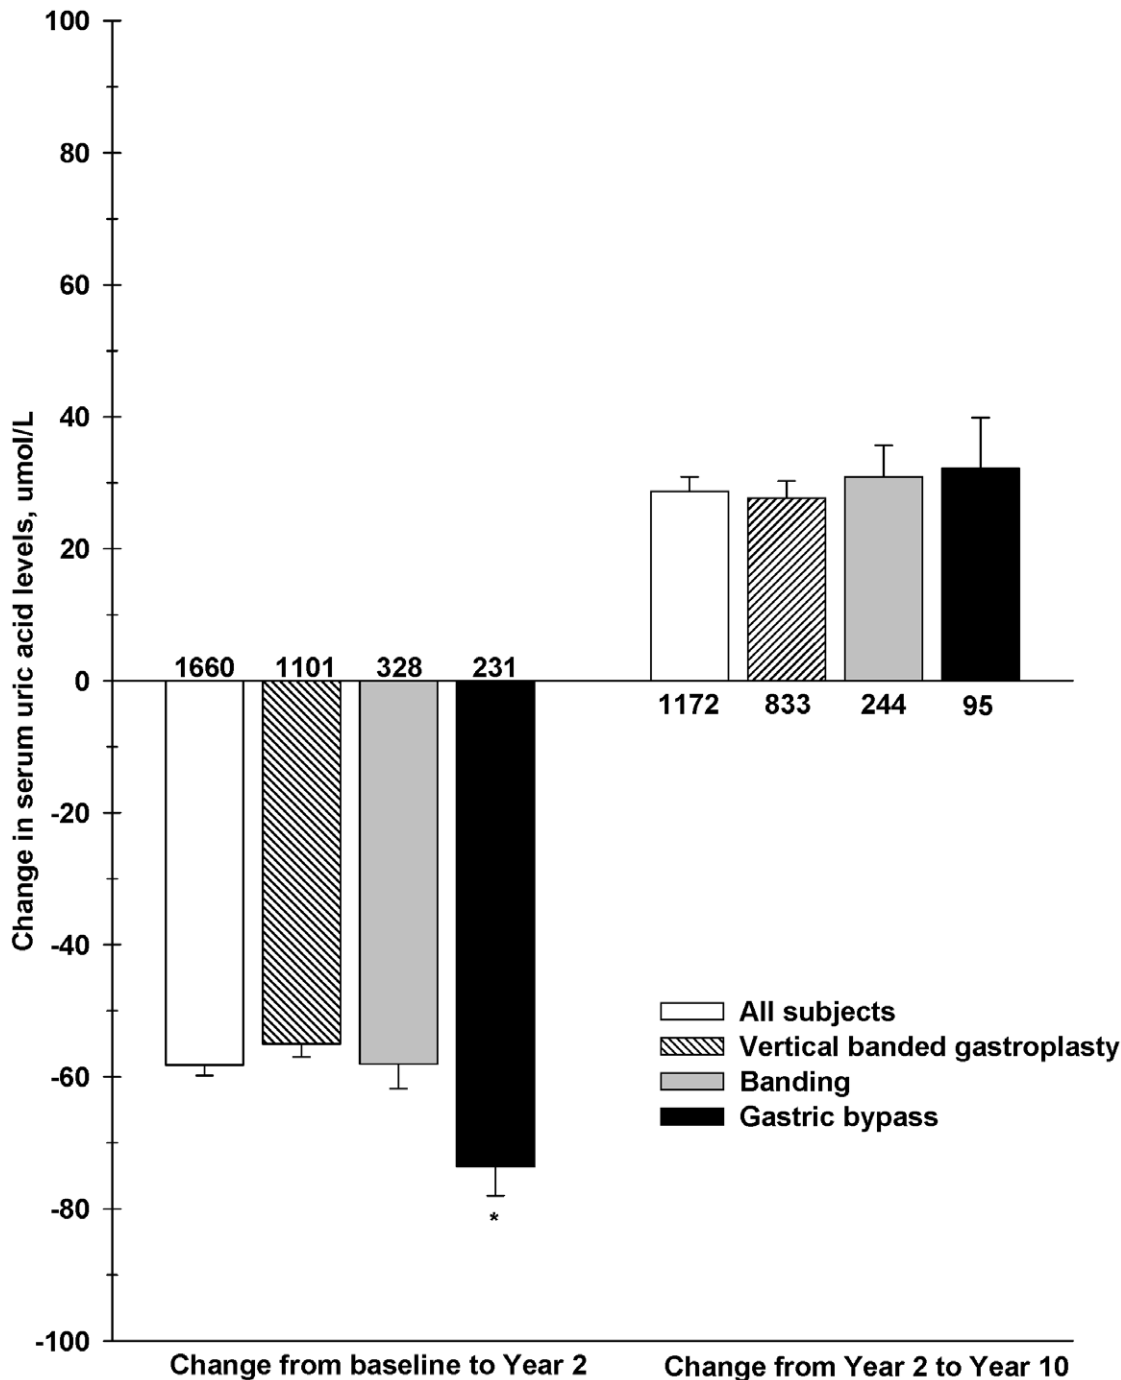

**Figure 1. Mean changes in uric acid levels up to 10 years after bariatric surgery in SOS.** The number of subjects in each group is indicated above or below each histogram bar. \*P=0.0002 for mean difference between gastric bypass and banding procedures groups. doi:10.1371/journal.pone.0051658.g001

Since associations were tested with 14 SNPs, we applied a multiple testing correction as proposed by Nyholt [32]. Briefly, the method uses spectral decomposition of matrices of pairwise LDs ( $r$ ) to estimate variance of eigenvalues. The effective number of independent SNPs for each candidate gene can be calculated based on the ratio of observed eigenvalue variance and its maximum. The effective number of SNPs can then be used to adjust the standard  $\alpha$  level (e.g., 5%). Thus, in our study the corrected threshold for statistical significance was set to  $P=0.007$  (0.05/7) as the total effective number of SNPs was 7.

**Results**

**Subject Characteristics**

Table 1 shows the basic characteristics at baseline, Year 2, and Year 10 in all subjects and by surgical technique. Overall, mean weight loss was about 29 kg from baseline to Year 2 after surgery (weight loss period), whereas subjects regained an average of 7.3 kg of weight from Year 2 to Year 10 after surgery (weight regain period).

**Table 2.** Associations between changes in serum uric acid levels and *SLC2A9* SNPs in SOS bariatric surgery patients when number of subjects has been maximized locally.

| <i>SLC2A9</i> | Changes in uric acid |                |         |                   |                |         |
|---------------|----------------------|----------------|---------|-------------------|----------------|---------|
|               | Baseline to Year 2   |                |         | Year 2 to Year 10 |                |         |
|               | N = 1660             |                |         | N = 1172          |                |         |
| SNP           | $\beta$              | R <sup>2</sup> | p-value | $\beta$           | R <sup>2</sup> | p-value |
| rs2280205     | 0.34                 | 0.00%          | 0.88    | 4.83              | 0.24%          | 0.10    |
| rs3733591     | 2.40                 | 0.05%          | 0.37    | -5.53             | 0.20%          | 0.13    |
| rs734553      | 6.81                 | 0.44%          | 0.008   | -2.89             | 0.06%          | 0.41    |
| rs13129697    | 4.57                 | 0.21%          | 0.06    | -2.55             | 0.05%          | 0.45    |
| rs737267      | 7.78                 | 0.59%          | 0.002   | -4.56             | 0.16%          | 0.18    |
| rs4447863     | 2.87                 | 0.11%          | 0.18    | -1.52             | 0.02%          | 0.60    |
| rs7442295     | 6.98                 | 0.42%          | 0.009   | -0.06             | 0.00%          | 0.99    |
| rs13131257    | 6.32                 | 0.33%          | 0.02    | -1.68             | 0.02%          | 0.65    |
| rs13125646    | 6.26                 | 0.33%          | 0.02    | -1.74             | 0.02%          | 0.64    |
| rs6449213     | 5.40                 | 0.23%          | 0.05    | -0.29             | 0.00%          | 0.94    |
| rs13113918    | 6.44                 | 0.36%          | 0.02    | -3.66             | 0.09%          | 0.32    |
| rs1014290     | 4.55                 | 0.20%          | 0.08    | -2.55             | 0.05%          | 0.47    |
| rs9291642     | 4.35                 | 0.11%          | 0.18    | -1.86             | 0.02%          | 0.67    |
| rs6820230     | 0.21                 | 0.00%          | 0.93    | -0.14             | 0.00%          | 0.96    |

All models are adjusted for age, sex, and percent change in body weight.  $\beta$  values represent change in changes in uric acid level ( $\mu\text{mol/L}$ ) per copy of minor allele carried. To convert  $\mu\text{mol/L}$  to  $\text{mg/dL}$  divide values by 59.48. doi:10.1371/journal.pone.0051658.t002

### Uric Acid Changes After Bariatric Surgery

Individual changes of uric acid during the weight loss period ranged from a decrease of 443.2  $\mu\text{mol/L}$  to an increase of 220.5  $\mu\text{mol/L}$ , and during the weight regain period ranged from a decrease of 484.1  $\mu\text{mol/L}$  to an increase of 359.1  $\mu\text{mol/L}$ . As shown in Figure 1 and Table 1, uric acid levels significantly decreased from baseline to Year 2 in all subjects, with the gastric bypass group showing a significantly larger mean decrease than the banding procedures groups, which was explained by the greater weight loss in this group ( $P=0.12$  when adjusting for change in weight). Conversely, uric acid levels increased by  $28.7 \pm 75.1 \mu\text{mol/L}$  from Year 2 to Year 10 after surgery in all subjects, with no differences between surgical techniques (Table 1). There were no sex differences in the changes in uric acid levels from baseline to year 2. However, females had a significantly ( $P=0.0005$ ) larger mean increase ( $33.9 \pm 73.7 \mu\text{mol/L}$ ) in uric acid levels from Year 2 to Year 10 compared to males ( $16.0 \pm 90.5 \mu\text{mol/L}$ ).

### Factors Associated with Changes in Uric Acid

Change in weight was significantly correlated with change in uric acid levels from baseline to Year 2 ( $r = 0.39, p < 0.0001$ ) and from Year 2 to Year 10 ( $r = 0.34, p < 0.0001$ ). Of the nine variables entered in the multivariable regression models, change in weight was the strongest predictor of change in uric acid levels after bariatric surgery (Supplementary Tables S1, S2, S3). Weight change from baseline to Year 2 explained 14.6% of the variance ( $\beta_{\text{coeff}} = 1.72, p < 0.0001$ ) in change in uric acid level during the same time period, while weight change from Year 2 to Year 10 explained 11.9% of the variance ( $\beta_{\text{coeff}} = 1.84, p < 0.0001$ ) in change in uric acid level during the same time period.

### Association of *SLC2A9* SNPs with Changes in Uric Acid

The minor allele frequencies, Hardy-Weinberg equilibrium, and pairwise LD among all included SNPs can be found in Supplementary Table S1, S3. All SNPs were in Hardy-Weinberg equilibrium, while several SNPs were in strong LD ( $r^2 > 0.80$ ). The associations of *SLC2A9* SNPs with changes in uric acid levels up to 10 years after bariatric surgery are shown in Table 2. Several SNPs showed nominal ( $p < 0.05$ ) associations with changes in uric acid levels from baseline to Year 2 after bariatric surgery, with only one remaining statistically significant after correcting for multiple testing. The *SLC2A9* rs737267 SNP showed a statistically significant association ( $R^2 = 0.60\%, P = 0.002$ ) with change in uric acid levels from baseline to Year 2, as common allele homozygotes (C/C:  $-61.4 \mu\text{mol/L}$ ,  $N = 957$ ) showed a larger decrease in uric acid compared to minor allele carriers (A/C:  $-52.3 \mu\text{mol/L}$ ,  $N = 603$  and A/A:  $-48.2 \mu\text{mol/L}$ ,  $N = 99$ ). None of the SNPs were significantly associated with changes in uric acid from Year 2 to Year 10 after bariatric surgery (Table 2). The associations of *SLC2A9* SNPs with changes in uric acid levels for each surgical procedure group can be found in Supplementary Table S4.

### Cross-sectional *SLC2A9* SNP Associations

The associations of *SLC2A9* SNPs with cross-sectional uric acid levels at baseline, Year 2, and Year 10 are shown in Table 3. After adjusting for covariates, 11 of the 14 tested SNPs were significantly associated with uric acid levels at all three time points, with *SLC2A9* SNP rs13113918 showing the strongest association at each time point ( $R^2 = 3.7-5.2\%, 3.9 \times 10^{-22} \leq p \leq 7.7 \times 10^{-11}$ ). As shown in Figure 2, the rank order of mean uric acid levels across rs13113918 genotype did not shift over ten years after bariatric surgery, as common allele homozygotes (G/G) had the highest mean uric acid levels followed by heterozygotes (A/G) and minor allele homozygotes (A/A) at all three time points. The cross-sectional association results for each surgical procedure group are presented in Supplementary Tables S5, S6, S7.

**Prediction of prevalent hyperuricemia with and without *SLC2A9* rs13113918 genotype.** The C statistic (area under the curve) for prevalence of hyperuricemia was 0.69 with and 0.66 without inclusion of rs13113918 genotype at baseline, 0.75 with and 0.73 without genotype at Year 2, and 0.76 with and 0.75 without genotype at Year 10 (Supplementary Figures S1, S2, S3).

### *SLC2A9* Genotype by Sex Interactions

We found evidence of genotype by sex interactions (tested using SNP rs13113918) on uric acid levels at baseline ( $P = 0.03$ ), Year 2 ( $P = 0.03$ ), and Year 10 ( $P = 0.001$ ), as the genotype effect sizes were larger in females at all three time points. For example, in stratified analyses, the association of rs13113918 genotype with baseline uric acid levels was significant in both men ( $P = 0.0006$ ) and women ( $P = 3.3 \times 10^{-21}$ ), but the genotype effect size was three times larger in women ( $R^2 = 7.0\%$ ) compared to men ( $R^2 = 2.3\%$ ). No genotype by sex interactions (tested using SNP rs737267) were observed in either of the longitudinal change in uric acid models.

### Discussion

We examined the association of GWAS-derived and exonic *SLC2A9* variants with serum uric acid levels in severely obese subjects, who lost weight, up to ten years after bariatric surgery. Although one SNP showed an association with change in uric acid from baseline to Year 2 after bariatric surgery, no SNPs were associated with change in uric acid from years 2 to 10 after surgery. We found that the increases and decreases in uric acid levels were driven by the weight losses and gains; independent of

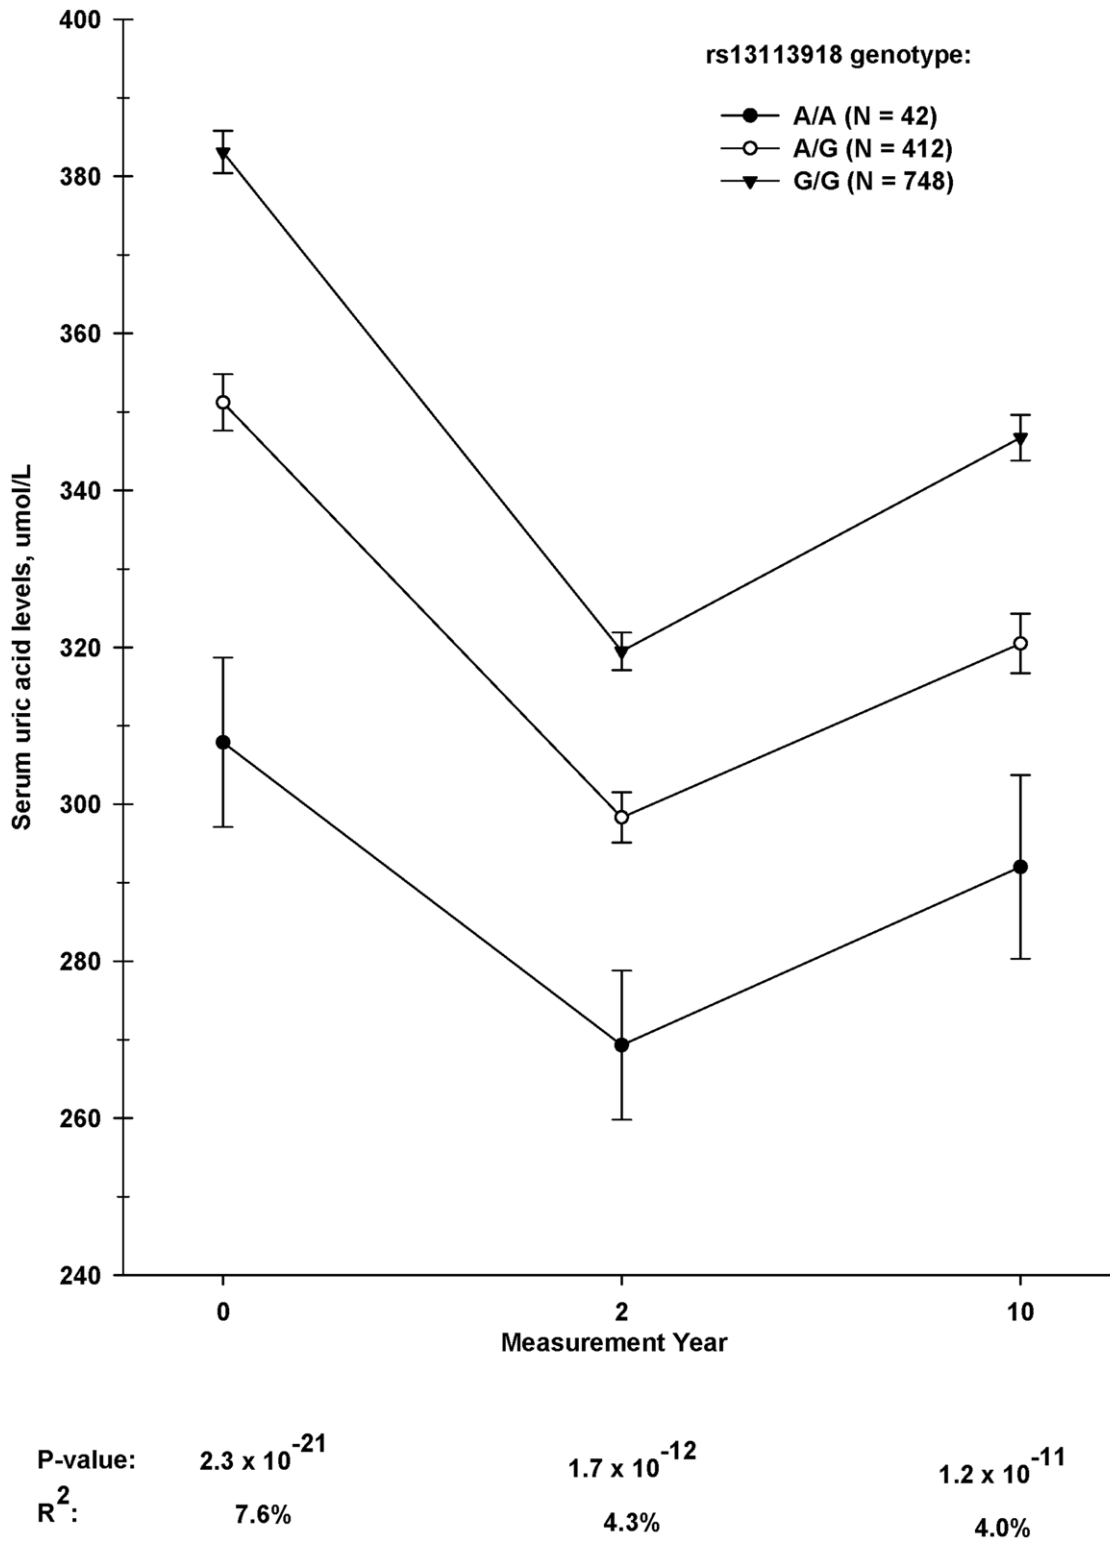

**Figure 2. Uric acid levels at baseline and years 2 and 10 stratified by *SLC2A9* rs13113918 genotype.** The number of subjects has been maximized globally (N=1175 for all time points). Mean values adjusted for age, sex, and BMI. R<sup>2</sup> is the proportion of total uric acid variance (%) explained by the SNP in the model. doi:10.1371/journal.pone.0051658.g002

*SLC2A9* genotypes, i.e. there was little evidence for an interaction between *SLC2A9* variants and weight change on changes in uric acid up to ten years after surgery. For example, the interaction

between *SLC2A9* SNP rs13113918 genotype and Δweight on Δuric acid was not statistically significant from baseline to Year 2 (P = 0.04) or from Year 2 to Year 10 (P = 0.79). Thus, based on the

**Table 3.** Cross-sectional associations between serum uric acid levels and *SLC2A9* SNPs in SOS bariatric surgery patients when number of subjects has been maximized locally.

| <i>SLC2A9</i> | Baseline |                |                       | Year 2  |                |                       | Year 10 |                |                       |  |
|---------------|----------|----------------|-----------------------|---------|----------------|-----------------------|---------|----------------|-----------------------|--|
|               | $\beta$  | R <sup>2</sup> | p-value               | $\beta$ | R <sup>2</sup> | p-value               | $\beta$ | R <sup>2</sup> | p-value               |  |
|               |          | N = 1806       |                       |         | N = 1664       |                       |         | N = 1201       |                       |  |
| SNP           | $\beta$  | R <sup>2</sup> | p-value               | $\beta$ | R <sup>2</sup> | p-value               | $\beta$ | R <sup>2</sup> | p-value               |  |
| rs2280205     | -6.09    | 0.36%          | 0.01                  | -5.78   | 0.43%          | 0.009                 | -2.72   | 0.07%          | 0.38                  |  |
| rs3733591     | -0.17    | 0.00%          | 0.95                  | 2.48    | 0.05%          | 0.36                  | -3.50   | 0.07%          | 0.37                  |  |
| rs734553      | -26.65   | 4.98%          | $2.8 \times 10^{-21}$ | -21.31  | 4.15%          | $1.1 \times 10^{-16}$ | -20.88  | 2.76%          | $1.7 \times 10^{-8}$  |  |
| rs13129697    | -23.91   | 4.34%          | $9.1 \times 10^{-19}$ | -20.60  | 3.98%          | $4.3 \times 10^{-16}$ | -21.12  | 3.06%          | $3.9 \times 10^{-9}$  |  |
| rs737267      | -25.99   | 4.88%          | $2.0 \times 10^{-21}$ | -19.60  | 3.62%          | $5.2 \times 10^{-15}$ | -21.31  | 2.97%          | $2.7 \times 10^{-9}$  |  |
| rs4447863     | -13.56   | 1.80%          | $1.3 \times 10^{-8}$  | -10.95  | 1.53%          | $5.0 \times 10^{-7}$  | -13.10  | 1.52%          | $1.9 \times 10^{-5}$  |  |
| rs7442295     | -28.22   | 5.12%          | $2.8 \times 10^{-22}$ | -22.48  | 4.24%          | $3.0 \times 10^{-17}$ | -19.16  | 2.14%          | $5.7 \times 10^{-7}$  |  |
| rs13131257    | -27.37   | 4.65%          | $2.5 \times 10^{-20}$ | -22.10  | 3.95%          | $4.0 \times 10^{-16}$ | -20.64  | 2.39%          | $1.2 \times 10^{-7}$  |  |
| rs13125646    | -27.48   | 4.62%          | $3.3 \times 10^{-20}$ | -22.06  | 3.94%          | $4.3 \times 10^{-16}$ | -20.65  | 2.39%          | $1.2 \times 10^{-7}$  |  |
| rs6449213     | -28.31   | 4.74%          | $3.0 \times 10^{-20}$ | -23.77  | 4.35%          | $2.6 \times 10^{-17}$ | -21.62  | 2.50%          | $7.8 \times 10^{-8}$  |  |
| rs13113918    | -28.54   | 5.23%          | $3.9 \times 10^{-22}$ | -23.18  | 4.50%          | $9.6 \times 10^{-18}$ | -25.21  | 3.69%          | $7.7 \times 10^{-11}$ |  |
| rs1014290     | -25.85   | 4.74%          | $3.7 \times 10^{-20}$ | -21.65  | 4.34%          | $3.6 \times 10^{-17}$ | -23.79  | 3.63%          | $1.7 \times 10^{-10}$ |  |
| rs9291642     | -22.67   | 2.25%          | $1.9 \times 10^{-10}$ | -19.83  | 2.24%          | $1.2 \times 10^{-9}$  | -18.84  | 1.40%          | $5.1 \times 10^{-5}$  |  |
| rs6820230     | -2.49    | 0.05%          | 0.34                  | -1.58   | 0.03%          | 0.51                  | -4.24   | 0.13%          | 0.20                  |  |

All models are adjusted for age, sex, and body weight.  $\beta$  values represent change in cross-sectional uric acid level ( $\mu\text{mol/L}$ ) per copy of minor allele carried. To convert  $\mu\text{mol/L}$  to  $\text{mg/dL}$  divide values by 59.48.

doi:10.1371/journal.pone.0051658.t003

top *SLC2A9* SNP, rs13113918, we can predict cross-sectional uric acid levels in obese individuals, as the rank order of mean uric acid levels across rs13113918 genotype did not shift following bariatric surgery. Furthermore, including *SLC2A9* rs13113918 genotype in logistic regression models improved the prediction of prevalent hyperuricemia at all three time points compared to models not including genotype. Therefore, our findings have potential clinical significance, as we can predict which individuals are predisposed to elevated uric acid levels using variation in the *SLC2A9* gene locus, even after lifestyle changes resulting in weight loss or weight gain.

*SLC2A9* encodes a transporter protein that belongs to class II of the facilitative glucose transporter family [33] and is thought to be both a urate and fructose transporter [34]. The role of *SLC2A9* variants on *SLC2A9* function is unknown. Thus, it is unknown how polymorphisms in *SLC2A9* may alter serum uric acid levels. A possible mechanism may be through modulation of renal excretion of uric acid, as polymorphisms of *SLC2A9* have also been shown to be associated with a low fractional excretion of uric acid [24]. In previous GWAS reports, the strongest associations were mapped to non-coding SNPs located near the 5' end of the gene and within introns 3–7. The strongest cross-sectional associations in the present study were found with rs13113918, a coding SNP that gives rise to a synonymous substitution (Leu79Leu). Although ten coding SNPs have been reported, five of which give rise to nonsynonymous amino acid substitutions, these SNPs showed less significant associations with serum uric acid than intronic SNPs in previous GWAS reports [24,27]. This was also the case in the present study, as the three included nonsynonymous SNPs (rs2280205, rs3733591, rs6820230) showed no associations with cross-sectional uric acid levels or changes in uric acid over ten years.

Our results confirmed that uric acid levels varied closely with body weight and that SNPs in *SLC2A9* were associated with cross-sectional measures of uric acid, with sex-specific effects, as expected from the literature [20–25,27]. The association of increased uric

acid levels and obesity is well-established. We along with other studies [14,15] have shown that sustained weight reduction, as a result of bariatric surgery, resulted in decreased serum uric acid levels in obese adults. The significant reduction in uric acid levels after bariatric surgery may be explained by a correction of uric acid renal clearance resulting from the near-normalization of hyperinsulinemia and insulin resistance in these subjects [6,15,35].

There is large inter-individual variation in uric acid levels regardless of weight status, which may be due to environmental and/or genetic differences. The present study found negligible evidence of interactions between *SLC2A9* variants and weight change on changes in uric acid up to ten years after bariatric surgery. There is a large body of evidence that shows when uric acid levels and body weight are assumed to be stable, *SLC2A9* genotype(s) can predict uric acid levels [20–25,27]. However, when weight changes, uric acid levels also change and reach new steady state levels, independent of *SLC2A9* genotype. Thus, *SLC2A9* predicts the new cross-sectional uric acid level steady state, but does not appear to be involved in changes in uric acid levels due to weight loss, and presumably other metabolic changes induced by bariatric surgery. In other words, *SLC2A9* genotype does not appear to drive changes in uric acid levels when weight decreases or increases.

In conclusion, we found that weight changes were the driver of changes in uric acid levels, explaining less than 15% of the variance in uric acid level changes following bariatric surgery, with *SLC2A9* genotype accounting for a negligible proportion (<1%). Thus, a large portion of the variance is still unaccounted for. Our results indicate that *SLC2A9* variants had little effect on the inter-individual variation in the changes of uric acid in response to weight fluctuations induced by bariatric surgery. Although it appears that common *SLC2A9* variants do not contribute to uric acid changes in response to weight fluctuation, we cannot exclude other types of gene by weight interaction effects, as only 6% of the variation in

serum uric acid can be accounted for by *SLC2A9* polymorphisms [22]. Therefore, further studies are needed that employ a genome-wide approach to identify the variants, outside of *SLC2A9*, associated with uric acid level changes in response to weight loss induced by bariatric surgery and/or lifestyle modifications.

## Supporting Information

**Figure S1 ROC curves for the prediction of prevalent hyperuricemia at baseline in SOS subjects.** The blue line represents the results when *SLC2A9* rs13113918 genotype is included in the model, while the green line represents the results without genotype in the model. (PDF)

**Figure S2 ROC curves for the prediction of prevalent hyperuricemia at Year 2 in SOS subjects.** The blue line represents the results when *SLC2A9* rs13113918 genotype is included in the model, while the green line represents the results without genotype in the model. (PDF)

**Figure S3 ROC curves for the prediction of prevalent hyperuricemia at Year 10 in SOS subjects.** The blue line represents the results when *SLC2A9* rs13113918 genotype is included in the model, while the green line represents the results without genotype in the model. (PDF)

**Table S1 Results of multivariate regression model with forward selection for predictors of change in uric acid from baseline to Year 2.** (DOC)

**Table S2 Results of multivariate regression model with forward selection for predictors of change in uric acid from Year 2 to Year 10.** (DOC)

**Table S3 SNP physical map locations, minor allele frequencies (MAF), Hardy-Weinberg equilibrium (HWE)**

**test statistics, and pairwise linkage disequilibrium estimates ( $r^2$  below median,  $D'$  above median) for *SLC2A9* SNPs in SOS bariatric surgery patients.** (DOC)

**Table S4 Associations between changes in serum uric acid levels and *SLC2A9* SNPs in SOS patients by surgical procedure.** (DOC)

**Table S5 Cross-sectional associations between serum uric acid levels and *SLC2A9* SNPs in SOS vertical banded gastroplasty patients when number of subjects has been maximized locally.** (DOC)

**Table S6 Cross-sectional associations between serum uric acid levels and *SLC2A9* SNPs in SOS banding patients when number of subjects has been maximized locally.** (DOC)

**Table S7 Cross-sectional associations between serum uric acid levels and *SLC2A9* SNPs in SOS gastric bypass patients when number of subjects has been maximized locally.** (DOC)

## Acknowledgments

We thank the Macromolecular Crystallographic Facility (MCU) at IIC, IIT Roorkee for data collection, structure determination and refinement. We also thank Todd Geders for critical reading of the manuscript.

## Author Contributions

Conceived and designed the experiments: LS CB. Performed the experiments: PJ BC LS LMSC. Analyzed the data: MAS TR. Contributed reagents/materials/analysis tools: PJ TR BC LS CB LMSC. Wrote the paper: MAS. Reviewed and contributed to the final version of the manuscript: MAS PJ TR BC LS CB LMSC.

## References

- Richette P, Bardin T (2010) Gout. *Lancet* 375: 318–328.
- Fang J, Alderman MH (2000) Serum Uric Acid and Cardiovascular Mortality. *JAMA: The Journal of the American Medical Association* 283: 2404–2410.
- Gagliardi AC, Miname MH, Santos RD (2009) Uric acid: A marker of increased cardiovascular risk. *Atherosclerosis* 202: 11–17.
- Emmerson BT (1996) The management of gout. *N Engl J Med* 334: 445–451.
- Takahashi S, Yamamoto T, Tsutsumi Z, Moriwaki Y, Yamakita J, et al. (1997) Close correlation between visceral fat accumulation and uric acid metabolism in healthy men. *Metabolism* 46: 1162–1165.
- Yamashita S, Matsuzawa Y, Tokunaga K, Fujioka S, Tarui S (1986) Studies on the impaired metabolism of uric acid in obese subjects: marked reduction of renal urate excretion and its improvement by a low-calorie diet. *Int J Obes* 10: 255–264.
- Onat A, Uyarel H, Hergenc G, Karabulut A, Albayrak S, et al. (2006) Serum uric acid is a determinant of metabolic syndrome in a population-based study. *Am J Hypertens* 19: 1055–1062.
- Choi HK, Atkinson K, Karlson EW, Curhan G (2005) Obesity, weight change, hypertension, diuretic use, and risk of gout in men: the health professionals follow-up study. *Arch Intern Med* 165: 742–748.
- Dessein PH, Shipton EA, Stanwix AE, Joffe BI, Ramogadi J (2000) Beneficial effects of weight loss associated with moderate calorie/carbohydrate restriction, and increased proportional intake of protein and unsaturated fat on serum urate and lipoprotein levels in gout: a pilot study. *Ann Rheum Dis* 59: 539–543.
- Heyden S, Borhani NO, Tyroler HA, Schneider KA, Langford HG, et al. (1985) The relationship of weight change to changes in blood pressure, serum uric acid, cholesterol and glucose in the treatment of hypertension. *J Chronic Dis* 38: 281–288.
- Ishizaka N, Ishizaka Y, Toda A, Tani M, Koike K, et al. (2010) Changes in waist circumference and body mass index in relation to changes in serum uric acid in Japanese individuals. *J Rheumatol* 37: 410–416.
- Rathmann W, Haastert B, Icks A, Giani G, Roseman JM (2007) Ten-year change in serum uric acid and its relation to changes in other metabolic risk factors in young black and white adults: the CARDIA study. *Eur J Epidemiol* 22: 439–445.
- Masuo K, Kawaguchi H, Mikami H, Ogihara T, Tuck ML (2003) Serum uric acid and plasma norepinephrine concentrations predict subsequent weight gain and blood pressure elevation. *Hypertension* 42: 474–480.
- Luyckx FH, Scheen AJ, Desai C, Dewe W, Gielen JE, et al. (1998) Effects of gastroplasty on body weight and related biological abnormalities in morbid obesity. *Diabetes Metab* 24: 355–361.
- Serpa Neto A, Rossi FM, Valle LG, Teixeira GK, Rossi M (2011) Relation of uric acid with components of metabolic syndrome before and after Roux-en-Y gastric bypass in morbidly obese subjects. *Arq Bras Endocrinol Metabol* 55: 38–45.
- Sjostrom L, Lindroos AK, Peltonen M, Torgerson J, Bouchard C, et al. (2004) Lifestyle, diabetes, and cardiovascular risk factors 10 years after bariatric surgery. *N Engl J Med* 351: 2683–2693.
- Rao DC, Laskarzewski PM, Morrison JA, Khoury P, Kelly K, et al. (1982) The Clinical Lipid Research Clinic Family Study: familial determinants of plasma uric acid. *Hum Genet* 60: 257–261.
- Whitfield JB, Martin NG (1983) Inheritance and alcohol as factors influencing plasma uric acid levels. *Acta Genet Med Gemellol (Roma)* 32: 117–126.
- Wilk JB, Djousse L, Borecki I, Atwood LD, Hunt SC, et al. (2000) Segregation analysis of serum uric acid in the NHLBI Family Heart Study. *Hum Genet* 106: 355–359.
- Charles BA, Shriner D, Doumatey A, Chen G, Zhou J, et al. (2011) A genome-wide association study of serum uric acid in African Americans. *BMC Med Genomics* 4: 17.
- Dehghan A, Kottgen A, Yang Q, Hwang SJ, Kao WL, et al. (2008) Association of three genetic loci with uric acid concentration and risk of gout: a genome-wide association study. *Lancet* 372: 1953–1961.



22. Doring A, Gieger C, Mehta D, Gohlke H, Prokisch H, et al. (2008) SLC2A9 influences uric acid concentrations with pronounced sex-specific effects. *Nat Genet* 40: 430–436.
23. Li S, Sanna S, Maschio A, Busonero F, Usala G, et al. (2007) The GLUT9 gene is associated with serum uric acid levels in Sardinia and Chianti cohorts. *PLoS Genet* 3: e194.
24. Vitart V, Rudan I, Hayward C, Gray NK, Floyd J, et al. (2008) SLC2A9 is a newly identified urate transporter influencing serum urate concentration, urate excretion and gout. *Nat Genet* 40: 437–442.
25. Wallace C, Newhouse SJ, Braund P, Zhang F, Tobin M, et al. (2008) Genome-wide association study identifies genes for biomarkers of cardiovascular disease: serum urate and dyslipidemia. *Am J Hum Genet* 82: 139–149.
26. Caulfield MJ, Munroe PB, O'Neill D, Witkowska K, Charchar FJ, et al. (2008) SLC2A9 is a high-capacity urate transporter in humans. *PLoS Med* 5: e197.
27. Kolz M, Johnson T, Sanna S, Teumer A, Vitart V, et al. (2009) Meta-analysis of 28,141 individuals identifies common variants within five new loci that influence uric acid concentrations. *PLoS Genet* 5: e1000504.
28. Brandstatter A, Kiechl S, Kollerits B, Hunt SC, Heid IM, et al. (2008) Sex-specific association of the putative fructose transporter SLC2A9 variants with uric acid levels is modified by BMI. *Diabetes Care* 31: 1662–1667.
29. Sjostrom L, Larsson B, Backman L, Bengtsson C, Bouchard C, et al. (1992) Swedish obese subjects (SOS). Recruitment for an intervention study and a selected description of the obese state. *Int J Obes Relat Metab Disord* 16: 465–479.
30. Abecasis GR, Cookson WO (2000) GOLD—graphical overview of linkage disequilibrium. *Bioinformatics* 16: 182–183.
31. Abecasis GR, Cherny SS, Cookson WO, Cardon LR (2002) Merlin—rapid analysis of dense genetic maps using sparse gene flow trees. *Nat Genet* 30: 97–101.
32. Nyholt DR (2004) A simple correction for multiple testing for single-nucleotide polymorphisms in linkage disequilibrium with each other. *Am J Hum Genet* 74: 765–769.
33. Joost HG, Thorens B (2001) The extended GLUT-family of sugar/polyol transport facilitators: nomenclature, sequence characteristics, and potential function of its novel members (review). *Mol Membr Biol* 18: 247–256.
34. Manolescu AR, Augustin R, Moley K, Cheeseman C (2007) A highly conserved hydrophobic motif in the exofacial vestibule of fructose transporting SLC2A proteins acts as a critical determinant of their substrate selectivity. *Mol Membr Biol* 24: 455–463.
35. Quinones Galvan A, Natali A, Baldi S, Frascerra S, Sanna G, et al. (1995) Effect of insulin on uric acid excretion in humans. *American Journal of Physiology - Endocrinology And Metabolism* 268: E1–E5.
