# Supplementary material for: Changes in Uric Acid Levels following Bariatric Surgery Are Not Associated with SLC2A9 Variants in the Swedish Obese Subjects Study
Source: PLOS journal article supplement (doi:10.1371/journal.pone.0051658), 2012-12-14
Supplement: S3 (10.1371/journal.pone.0051658.s003) [file journal.pone.0051658.s003]

# Comparison of ROC curves for hyperuricemia at Yr 10 with and w/o genotype

Approximate area under curve = 0.76 & 0.75

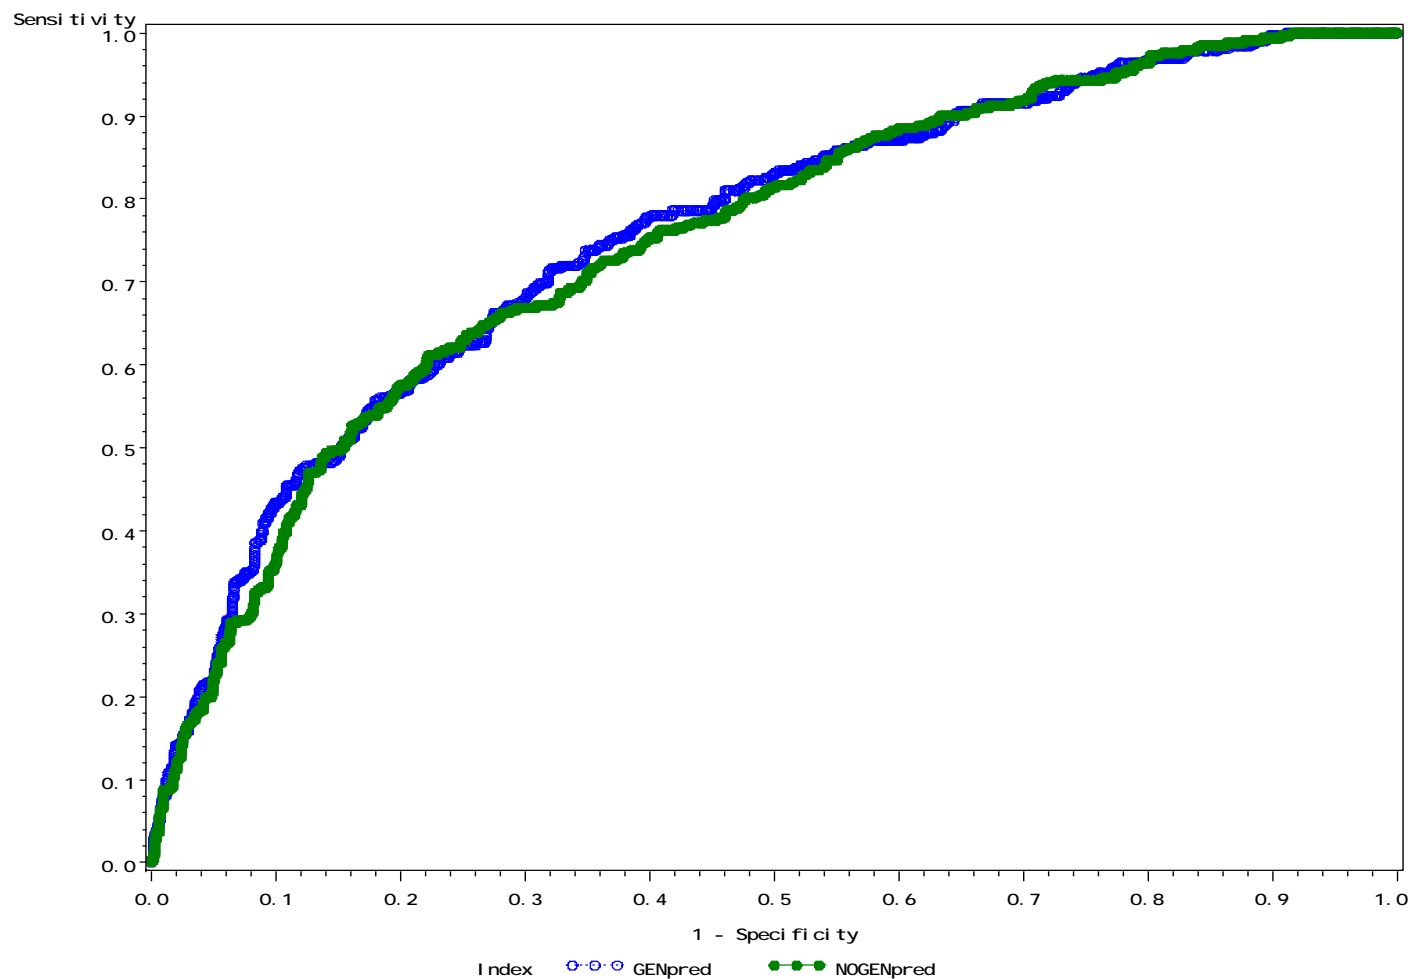

**Figure S3.** ROC curves for the prediction of prevalent hyperuricemia at Year 10 in SOS subjects with (blue line) and without (green line) the inclusion of SLC2A9 rs13113918 genotype in the model.
